# Supplementary material for: Construction and validation of risk models of prognostic genes associated with parthanatos in papillary thyroid carcinoma based on bioinformatics
Source: Research Square preprint supplement (doi:10.21203/rs.3.rs-6673087/v1), 2025-07-22
Supplement: Supplementary file 1 [file c3b18ffec122cdeea8275fdc.docx]

Supplementary Table 1. PCR program

|  | Temperature | Time |
| --- | --- | --- |
| Predegeneration | 95℃ | 1min |
| Denaturation | 95℃ | 20s |
| Anneal | 55℃ | 20s |
| Extend | 72℃ | 30s |

Supplementary Table 2. Primer sequences

| Primer | Sequences |
| --- | --- |
| SGPP2 F | CAGGATTCCCAGCTCGTCG |
| SGPP2 R | CCATGACACTCAGTCCTCCG |
| PELI2 F | GTGAAATACGGGGAGCTGGT |
| PELI2 R | GCTGATAGCCTTGGATGCCT |
| AK1 F | TGAAACGTGGAGAGACCAGC |
| AK1 R | GCAGACCTGGGAGAAGACAC |
| TSHZ3 F | TGGACAGCGAGTCACACATC |
| TSHZ3 R | CGACACAGTCGTGTCTTCCA |
| SERGEF F | CTGGAGTGGATGGACACACC |
| SERGEF R | TTCGGTGGTCTTGAACAGGG |
| AKAP12 F | AAAGCAAATGGGGACTCGGA |
| AKAP12 R | CAGCCTGCGAATGAAGGAGA |
| ASGR1 F | GACACGCAGACACAGAGACA |
| ASGR1 R | CTGGACCTGGGATTGCTCAG |
| Internal controls - GAPDH F | CGAAGGTGGAGTCAACGGATTT |
| Internal controls - GAPDH R | ATGGGTGGAATCATATTGGAAC |

Supplementary Table 3. The concentration and purity of the sample

| Number | Sample | Group | Concentration(ng/uL) |
| --- | --- | --- | --- |
| 1 | 1N | Control | 477.76 |
| 2 | 2N | Control | 336.52 |
| 3 | 4N | Control | 1559.4 |
| 4 | 5N | Control | 485.56 |
| 5 | 6N | Control | 621.64 |
| 6 | 1CA | THCA | 115.84 |
| 7 | 2CA | THCA | 159.6 |
| 8 | 4CA | THCA | 342.92 |
| 9 | 5CA | THCA | 175.64 |
| 10 | 6CA | THCA | 1582.6 |
